# Supplementary material
Source: publisher figshare collection journal article supplement (https://acs.figshare.com/ndownloader/files/4581916)
Supplement: Supplementary file 1 [file 4581916]

 
data_feface 
 
_audit_creation_method            SHELXL-97 
_chemical_name_systematic 
; 
 ? 
; 
_chemical_name_common             ? 
_chemical_melting_point           ? 
_chemical_formula_moiety          ? 
_chemical_formula_sum 
 'C16 H36 Fe N2' 
_chemical_formula_weight          312.32 
 
loop_ 
 _atom_type_symbol 
 _atom_type_description 
 _atom_type_scat_dispersion_real 
 _atom_type_scat_dispersion_imag 
 _atom_type_scat_source 
 'C'  'C'   0.0033   0.0016 
 'International Tables Vol C Tables 4.2.6.8 and 6.1.1.4' 
 'H'  'H'   0.0000   0.0000 
 'International Tables Vol C Tables 4.2.6.8 and 6.1.1.4' 
 'N'  'N'   0.0061   0.0033 
 'International Tables Vol C Tables 4.2.6.8 and 6.1.1.4' 
 'Fe'  'Fe'   0.3463   0.8444 
 'International Tables Vol C Tables 4.2.6.8 and 6.1.1.4' 
 
_symmetry_cell_setting            'Orthorhombic' 
_symmetry_space_group_name_H-M    P2(1)2(1)2(1) 
 
loop_ 
 _symmetry_equiv_pos_as_xyz 
 'x, y, z' 
 '-x+1/2, -y, z+1/2' 
 '-x, y+1/2, -z+1/2' 
 'x+1/2, -y+1/2, -z' 
 
_cell_length_a                    7.7544(11) 
_cell_length_b                    11.0912(15) 
_cell_length_c                    22.122(3) 
_cell_angle_alpha                 90.00 
_cell_angle_beta                  90.00 
_cell_angle_gamma                 90.00 
_cell_volume                      1902.6(5) 
_cell_formula_units_Z             4 
_cell_measurement_temperature     193(2) 
_cell_measurement_reflns_used     7102 
_cell_measurement_theta_min       2.05 
_cell_measurement_theta_max       28.70 
 
_exptl_crystal_description        'prism' 
_exptl_crystal_colour             'orange' 
_exptl_crystal_size_max           0.35 
_exptl_crystal_size_mid           0.35 
_exptl_crystal_size_min           0.14 
_exptl_crystal_density_meas       'not measured' 
_exptl_crystal_density_diffrn     1.090 
_exptl_crystal_density_method     'not measured' 
_exptl_crystal_F_000              688 
_exptl_absorpt_coefficient_mu     0.785 
_exptl_absorpt_correction_type    'integration' 
_exptl_absorpt_correction_T_min   0.776 
_exptl_absorpt_correction_T_max   0.882  
_exptl_absorpt_process_details    ? 
 
_exptl_special_details 
; 
 ? 
; 
 
_diffrn_ambient_temperature       193(2) 
_diffrn_radiation_wavelength      0.71073 
_diffrn_radiation_type            MoK\a 
_diffrn_radiation_source          'fine-focus sealed tube' 
_diffrn_radiation_monochromator   graphite 
_diffrn_measurement_device_type   'area detector' 
_diffrn_measurement_method        'area detector' 
_diffrn_detector_area_resol_mean  ? 
_diffrn_standards_number          ? 
_diffrn_standards_interval_count  ? 
_diffrn_standards_interval_time   ? 
_diffrn_standards_decay_%         ? 
_diffrn_reflns_number             17823 
_diffrn_reflns_av_R_equivalents   0.0788 
_diffrn_reflns_av_sigmaI/netI     0.0580 
_diffrn_reflns_limit_h_min        -10 
_diffrn_reflns_limit_h_max        10 
_diffrn_reflns_limit_k_min        -14 
_diffrn_reflns_limit_k_max        14 
_diffrn_reflns_limit_l_min        -26 
_diffrn_reflns_limit_l_max        29 
_diffrn_reflns_theta_min          2.05 
_diffrn_reflns_theta_max          28.70 
_reflns_number_total              4657 
_reflns_number_gt                 3063 
_reflns_threshold_expression      >2sigma(I) 
 
_computing_data_collection        ? 
_computing_cell_refinement        ? 
_computing_data_reduction         ? 
_computing_structure_solution     'SHELXS-97 (Sheldrick, 1990)' 
_computing_structure_refinement   'SHELXL-97 (Sheldrick, 1997)' 
_computing_molecular_graphics     ? 
_computing_publication_material   ? 
 
_refine_special_details 
; 
 Refinement of F^2^ against ALL reflections.  The weighted R-factor wR and 
 goodness of fit S are based on F^2^, conventional R-factors R are based 
 on F, with F set to zero for negative F^2^. The threshold expression of 
 F^2^ > 2sigma(F^2^) is used only for calculating R-factors(gt) etc. and is 
 not relevant to the choice of reflections for refinement.  R-factors based 
 on F^2^ are statistically about twice as large as those based on F, and R- 
 factors based on ALL data will be even larger. 
; 
 
_refine_ls_structure_factor_coef  Fsqd  
_refine_ls_matrix_type            full 
_refine_ls_weighting_scheme       calc  
_refine_ls_weighting_details 
 'calc w=1/[\s^2^(Fo^2^)+(0.0320P)^2^+0.0000P] where P=(Fo^2^+2Fc^2^)/3' 
_atom_sites_solution_primary      direct 
_atom_sites_solution_secondary    difmap 
_atom_sites_solution_hydrogens    geom 
_refine_ls_hydrogen_treatment     mixed 
_refine_ls_extinction_method      none 
_refine_ls_extinction_coef        ? 
_refine_ls_abs_structure_details 
 'Flack H D (1983), Acta Cryst. A39, 876-881' 
_refine_ls_abs_structure_Flack    0.00(5) 
_refine_ls_number_reflns          4657 
_refine_ls_number_parameters      281 
_refine_ls_number_restraints      0 
_refine_ls_R_factor_all           0.0654 
_refine_ls_R_factor_gt            0.0338 
_refine_ls_wR_factor_ref          0.0744 
_refine_ls_wR_factor_gt           0.0661 
_refine_ls_goodness_of_fit_ref    0.941 
_refine_ls_restrained_S_all       0.941 
_refine_ls_shift/su_max           0.001 
_refine_ls_shift/su_mean          0.000 
 
loop_ 
 _atom_site_label 
 _atom_site_type_symbol 
 _atom_site_fract_x 
 _atom_site_fract_y 
 _atom_site_fract_z 
 _atom_site_U_iso_or_equiv 
 _atom_site_adp_type 
 _atom_site_occupancy 
 _atom_site_symmetry_multiplicity 
 _atom_site_calc_flag 
 _atom_site_refinement_flags 
 _atom_site_disorder_assembly 
 _atom_site_disorder_group 
Fe Fe 0.25207(7) 0.37692(2) 0.126546(12) 0.02904(8) Uani 1 1 d . . . 
N1 N 0.1649(3) 0.53494(15) 0.12460(11) 0.0272(5) Uani 1 1 d . . . 
C1 C 0.0122(3) 0.56216(18) 0.16157(11) 0.0317(5) Uani 1 1 d . . . 
C2 C -0.0009(4) 0.4590(2) 0.20777(13) 0.0410(6) Uani 1 1 d . . . 
H2A H -0.018(5) 0.381(3) 0.1876(15) 0.061 Uiso 1 1 d . . . 
H2B H -0.113(5) 0.465(3) 0.2344(15) 0.061 Uiso 1 1 d . . . 
H2C H 0.100(5) 0.457(3) 0.2329(16) 0.061 Uiso 1 1 d . . . 
C3 C 0.0224(5) 0.6802(2) 0.19841(15) 0.0441(7) Uani 1 1 d . . . 
H3A H 0.131(5) 0.675(3) 0.2204(15) 0.066 Uiso 1 1 d . . . 
H3B H -0.087(5) 0.689(3) 0.2226(16) 0.066 Uiso 1 1 d . . . 
H3C H 0.024(4) 0.749(3) 0.1707(15) 0.066 Uiso 1 1 d . . . 
C4 C -0.1564(3) 0.5614(3) 0.12504(17) 0.0483(6) Uani 1 1 d . . . 
H4A H -0.160(5) 0.616(3) 0.1004(16) 0.072 Uiso 1 1 d . . . 
H4B H -0.261(6) 0.561(3) 0.1550(15) 0.072 Uiso 1 1 d . . . 
H4C H -0.177(5) 0.489(3) 0.1027(16) 0.072 Uiso 1 1 d . . . 
C5 C 0.2520(5) 0.6238(2) 0.08513(8) 0.0303(3) Uani 1 1 d . . . 
C6 C 0.3670(5) 0.5498(3) 0.04264(17) 0.0427(9) Uani 1 1 d . . . 
H6A H 0.442(5) 0.501(3) 0.0641(17) 0.064 Uiso 1 1 d . . . 
H6B H 0.432(5) 0.594(3) 0.0178(16) 0.064 Uiso 1 1 d . . . 
H6C H 0.296(5) 0.499(3) 0.0166(15) 0.064 Uiso 1 1 d . . . 
C7 C 0.1314(5) 0.6993(3) 0.04533(18) 0.0438(9) Uani 1 1 d . . . 
H7A H 0.066(5) 0.651(3) 0.0220(17) 0.066 Uiso 1 1 d . . . 
H7B H 0.201(4) 0.747(3) 0.0200(14) 0.066 Uiso 1 1 d . . . 
H7C H 0.067(5) 0.749(4) 0.0661(16) 0.066 Uiso 1 1 d . . . 
C8 C 0.3720(4) 0.7088(2) 0.12056(17) 0.0407(7) Uani 1 1 d . . . 
H8A H 0.312(4) 0.771(3) 0.1482(14) 0.061 Uiso 1 1 d . . . 
H8B H 0.450(4) 0.755(3) 0.0918(14) 0.061 Uiso 1 1 d . . . 
H8C H 0.456(4) 0.659(3) 0.1482(14) 0.061 Uiso 1 1 d . . . 
N2 N 0.3395(3) 0.21868(15) 0.12768(10) 0.0264(5) Uani 1 1 d . . . 
C9 C 0.4918(3) 0.19344(19) 0.16524(11) 0.0309(5) Uani 1 1 d . . . 
C10 C 0.5020(4) 0.2989(2) 0.21038(13) 0.0419(6) Uani 1 1 d . . . 
H10A H 0.506(5) 0.378(3) 0.1894(15) 0.063 Uiso 1 1 d . . . 
H10B H 0.607(5) 0.294(3) 0.2335(14) 0.063 Uiso 1 1 d . . . 
H10C H 0.405(5) 0.304(3) 0.2368(15) 0.063 Uiso 1 1 d . . . 
C11 C 0.4797(4) 0.0776(2) 0.20369(15) 0.0419(6) Uani 1 1 d . . . 
H11A H 0.377(5) 0.071(3) 0.2265(16) 0.063 Uiso 1 1 d . . . 
H11B H 0.585(5) 0.073(3) 0.2266(16) 0.063 Uiso 1 1 d . . . 
H11C H 0.477(5) 0.005(3) 0.1787(17) 0.063 Uiso 1 1 d . . . 
C12 C 0.6602(4) 0.1929(3) 0.12906(16) 0.0477(6) Uani 1 1 d . . . 
H12A H 0.666(4) 0.125(3) 0.1015(15) 0.072 Uiso 1 1 d . . . 
H12B H 0.757(6) 0.195(3) 0.1570(15) 0.072 Uiso 1 1 d . . . 
H12C H 0.667(4) 0.265(3) 0.1063(15) 0.072 Uiso 1 1 d . . . 
C13 C 0.2519(5) 0.1272(2) 0.08946(8) 0.0311(4) Uani 1 1 d . . . 
C14 C 0.3738(5) 0.0497(3) 0.05081(18) 0.0434(8) Uani 1 1 d . . . 
H14A H 0.448(5) 0.095(3) 0.0276(17) 0.065 Uiso 1 1 d . . . 
H14B H 0.298(5) -0.005(3) 0.0247(15) 0.065 Uiso 1 1 d . . . 
H14C H 0.442(5) -0.003(3) 0.0758(17) 0.065 Uiso 1 1 d . . . 
C15 C 0.1383(6) 0.1991(3) 0.04577(18) 0.0498(10) Uani 1 1 d . . . 
H15A H 0.070(5) 0.243(4) 0.0659(17) 0.075 Uiso 1 1 d . . . 
H15B H 0.069(5) 0.147(3) 0.0213(18) 0.075 Uiso 1 1 d . . . 
H15C H 0.209(5) 0.252(3) 0.0180(15) 0.075 Uiso 1 1 d . . . 
C16 C 0.1334(4) 0.0438(2) 0.12614(17) 0.0399(7) Uani 1 1 d . . . 
H16A H 0.209(4) -0.015(3) 0.1517(14) 0.060 Uiso 1 1 d . . . 
H16B H 0.061(5) 0.000(3) 0.1008(16) 0.060 Uiso 1 1 d . . . 
H16C H 0.066(4) 0.096(3) 0.1552(14) 0.060 Uiso 1 1 d . . . 
 
loop_ 
 _atom_site_aniso_label 
 _atom_site_aniso_U_11 
 _atom_site_aniso_U_22 
 _atom_site_aniso_U_33 
 _atom_site_aniso_U_23 
 _atom_site_aniso_U_13 
 _atom_site_aniso_U_12 
Fe 0.03576(14) 0.01883(11) 0.03253(14) 0.00056(13) -0.0001(5) 0.00527(14) 
N1 0.0307(10) 0.0191(8) 0.0316(12) 0.0022(10) 0.0053(11) 0.0024(7) 
C1 0.0329(13) 0.0274(11) 0.0346(15) -0.0031(10) 0.0026(12) 0.0050(9) 
C2 0.0454(16) 0.0401(13) 0.0375(15) 0.0032(12) 0.0111(14) -0.0008(13) 
C3 0.0487(18) 0.0379(13) 0.0457(18) -0.0124(12) 0.0057(15) 0.0066(13) 
C4 0.0337(14) 0.0564(17) 0.0549(18) -0.0001(16) -0.0076(17) 0.0019(12) 
C5 0.0353(9) 0.0222(7) 0.0333(9) 0.0030(12) -0.005(2) -0.0013(13) 
C6 0.054(2) 0.0335(15) 0.040(2) 0.0031(13) 0.0154(17) 0.0009(14) 
C7 0.052(2) 0.0358(15) 0.044(2) 0.0087(14) -0.0101(17) 0.0039(15) 
C8 0.0395(15) 0.0330(12) 0.050(2) 0.0031(14) -0.0046(16) -0.0066(11) 
N2 0.0324(11) 0.0195(8) 0.0272(12) -0.0005(9) -0.0008(11) 0.0029(7) 
C9 0.0317(13) 0.0300(11) 0.0308(14) 0.0052(10) -0.0019(11) 0.0018(9) 
C10 0.0462(16) 0.0363(13) 0.0431(16) -0.0019(12) -0.0133(15) 0.0034(12) 
C11 0.0474(17) 0.0359(12) 0.0424(17) 0.0133(11) -0.0059(15) 0.0046(12) 
C12 0.0358(14) 0.0531(15) 0.0543(18) 0.0035(16) 0.0055(17) 0.0005(12) 
C13 0.0419(10) 0.0235(7) 0.0279(8) -0.0022(12) 0.002(2) 0.0009(14) 
C14 0.060(2) 0.0312(15) 0.039(2) -0.0103(13) 0.0111(17) -0.0013(14) 
C15 0.067(3) 0.0392(16) 0.043(2) -0.0056(15) -0.0222(19) -0.0004(16) 
C16 0.0403(15) 0.0334(13) 0.0460(19) -0.0020(14) 0.0051(17) -0.0074(11) 
 
_geom_special_details 
; 
 All esds (except the esd in the dihedral angle between two l.s. planes) 
 are estimated using the full covariance matrix.  The cell esds are taken 
 into account individually in the estimation of esds in distances, angles 
 and torsion angles; correlations between esds in cell parameters are only 
 used when they are defined by crystal symmetry.  An approximate (isotropic) 
 treatment of cell esds is used for estimating esds involving l.s. planes. 
; 
 
loop_ 
 _geom_bond_atom_site_label_1 
 _geom_bond_atom_site_label_2 
 _geom_bond_distance 
 _geom_bond_site_symmetry_2 
 _geom_bond_publ_flag 
Fe N1 1.8790(18) . ? 
Fe N2 1.8817(18) . ? 
N1 C1 1.471(3) . ? 
N1 C5 1.480(3) . ? 
C1 C4 1.537(4) . ? 
C1 C2 1.538(4) . ? 
C1 C3 1.544(3) . ? 
C2 H2A 0.98(3) . ? 
C2 H2B 1.05(4) . ? 
C2 H2C 0.96(4) . ? 
C3 H3A 0.97(4) . ? 
C3 H3B 1.01(4) . ? 
C3 H3C 0.98(3) . ? 
C4 H4A 0.81(4) . ? 
C4 H4B 1.05(4) . ? 
C4 H4C 0.96(4) . ? 
C5 C7 1.533(4) . ? 
C5 C6 1.534(4) . ? 
C5 C8 1.539(4) . ? 
C6 H6A 0.92(4) . ? 
C6 H6B 0.90(4) . ? 
C6 H6C 0.98(3) . ? 
C7 H7A 0.90(4) . ? 
C7 H7B 0.94(3) . ? 
C7 H7C 0.88(4) . ? 
C8 H8A 1.03(3) . ? 
C8 H8B 1.02(3) . ? 
C8 H8C 1.05(3) . ? 
N2 C9 1.471(3) . ? 
N2 C13 1.485(3) . ? 
C9 C12 1.531(4) . ? 
C9 C10 1.540(3) . ? 
C9 C11 1.544(3) . ? 
C10 H10A 0.99(3) . ? 
C10 H10B 0.96(4) . ? 
C10 H10C 0.96(4) . ? 
C11 H11A 0.94(4) . ? 
C11 H11B 0.97(4) . ? 
C11 H11C 0.98(3) . ? 
C12 H12A 0.97(3) . ? 
C12 H12B 0.97(4) . ? 
C12 H12C 0.95(4) . ? 
C13 C15 1.531(4) . ? 
C13 C16 1.536(4) . ? 
C13 C14 1.538(4) . ? 
C14 H14A 0.92(4) . ? 
C14 H14B 1.02(4) . ? 
C14 H14C 0.96(4) . ? 
C15 H15A 0.84(4) . ? 
C15 H15B 0.96(4) . ? 
C15 H15C 1.01(4) . ? 
C16 H16A 1.04(3) . ? 
C16 H16B 0.93(4) . ? 
C16 H16C 1.01(3) . ? 
 
loop_ 
 _geom_angle_atom_site_label_1 
 _geom_angle_atom_site_label_2 
 _geom_angle_atom_site_label_3 
 _geom_angle 
 _geom_angle_site_symmetry_1 
 _geom_angle_site_symmetry_3 
 _geom_angle_publ_flag 
N1 Fe N2 179.45(8) . . ? 
C1 N1 C5 124.0(2) . . ? 
C1 N1 Fe 117.94(15) . . ? 
C5 N1 Fe 118.07(19) . . ? 
N1 C1 C4 113.0(2) . . ? 
N1 C1 C2 105.65(19) . . ? 
C4 C1 C2 106.8(2) . . ? 
N1 C1 C3 115.2(2) . . ? 
C4 C1 C3 109.0(2) . . ? 
C2 C1 C3 106.5(2) . . ? 
C1 C2 H2A 111(2) . . ? 
C1 C2 H2B 112.3(18) . . ? 
H2A C2 H2B 101(3) . . ? 
C1 C2 H2C 110(2) . . ? 
H2A C2 H2C 111(3) . . ? 
H2B C2 H2C 111(3) . . ? 
C1 C3 H3A 105.0(19) . . ? 
C1 C3 H3B 108.7(19) . . ? 
H3A C3 H3B 118(3) . . ? 
C1 C3 H3C 109(2) . . ? 
H3A C3 H3C 110(3) . . ? 
H3B C3 H3C 105(3) . . ? 
C1 C4 H4A 112(3) . . ? 
C1 C4 H4B 109.0(19) . . ? 
H4A C4 H4B 113(3) . . ? 
C1 C4 H4C 115(2) . . ? 
H4A C4 H4C 106(3) . . ? 
H4B C4 H4C 101(3) . . ? 
N1 C5 C7 115.1(3) . . ? 
N1 C5 C6 105.7(2) . . ? 
C7 C5 C6 107.14(19) . . ? 
N1 C5 C8 112.57(18) . . ? 
C7 C5 C8 109.1(2) . . ? 
C6 C5 C8 106.8(3) . . ? 
C5 C6 H6A 111(2) . . ? 
C5 C6 H6B 114(2) . . ? 
H6A C6 H6B 106(3) . . ? 
C5 C6 H6C 110(2) . . ? 
H6A C6 H6C 109(3) . . ? 
H6B C6 H6C 106(3) . . ? 
C5 C7 H7A 110(2) . . ? 
C5 C7 H7B 107(2) . . ? 
H7A C7 H7B 108(3) . . ? 
C5 C7 H7C 113(2) . . ? 
H7A C7 H7C 111(3) . . ? 
H7B C7 H7C 106(3) . . ? 
C5 C8 H8A 116.1(18) . . ? 
C5 C8 H8B 110.7(18) . . ? 
H8A C8 H8B 107(2) . . ? 
C5 C8 H8C 110.5(17) . . ? 
H8A C8 H8C 107(2) . . ? 
H8B C8 H8C 105(2) . . ? 
C9 N2 C13 123.99(19) . . ? 
C9 N2 Fe 118.32(15) . . ? 
C13 N2 Fe 117.67(18) . . ? 
N2 C9 C12 113.0(2) . . ? 
N2 C9 C10 105.2(2) . . ? 
C12 C9 C10 107.4(2) . . ? 
N2 C9 C11 114.9(2) . . ? 
C12 C9 C11 109.7(2) . . ? 
C10 C9 C11 106.1(2) . . ? 
C9 C10 H10A 112(2) . . ? 
C9 C10 H10B 110.3(18) . . ? 
H10A C10 H10B 106(3) . . ? 
C9 C10 H10C 114(2) . . ? 
H10A C10 H10C 105(3) . . ? 
H10B C10 H10C 110(3) . . ? 
C9 C11 H11A 114(2) . . ? 
C9 C11 H11B 106(2) . . ? 
H11A C11 H11B 116(3) . . ? 
C9 C11 H11C 112(2) . . ? 
H11A C11 H11C 103(3) . . ? 
H11B C11 H11C 106(3) . . ? 
C9 C12 H12A 112(2) . . ? 
C9 C12 H12B 109(2) . . ? 
H12A C12 H12B 112(3) . . ? 
C9 C12 H12C 108.6(19) . . ? 
H12A C12 H12C 109(3) . . ? 
H12B C12 H12C 106(3) . . ? 
N2 C13 C15 105.5(2) . . ? 
N2 C13 C16 112.61(17) . . ? 
C15 C13 C16 107.7(3) . . ? 
N2 C13 C14 114.7(3) . . ? 
C15 C13 C14 107.1(2) . . ? 
C16 C13 C14 108.9(2) . . ? 
C13 C14 H14A 113(2) . . ? 
C13 C14 H14B 107(2) . . ? 
H14A C14 H14B 112(3) . . ? 
C13 C14 H14C 111(2) . . ? 
H14A C14 H14C 108(3) . . ? 
H14B C14 H14C 107(3) . . ? 
C13 C15 H15A 109(3) . . ? 
C13 C15 H15B 111(2) . . ? 
H15A C15 H15B 107(3) . . ? 
C13 C15 H15C 112(2) . . ? 
H15A C15 H15C 109(3) . . ? 
H15B C15 H15C 108(3) . . ? 
C13 C16 H16A 109.0(19) . . ? 
C13 C16 H16B 111(2) . . ? 
H16A C16 H16B 110(3) . . ? 
C13 C16 H16C 107.5(17) . . ? 
H16A C16 H16C 108(3) . . ? 
H16B C16 H16C 112(3) . . ? 
 
_diffrn_measured_fraction_theta_max    0.969 
_diffrn_reflns_theta_full              28.70 
_diffrn_measured_fraction_theta_full   0.969 
_refine_diff_density_max    0.227 
_refine_diff_density_min   -0.273 
_refine_diff_density_rms    0.050 
